# Supplementary material
Source: PubMed Central journal article supplement (PMC5752883)
Supplement: ajtr0009-5308-f8.pdf [file ajtr0009-5308-f8.pdf]

Hypoxia-GYKI PC prevents cerebral ischemic injury by HIF-1 $\alpha$ /eNOS pathway

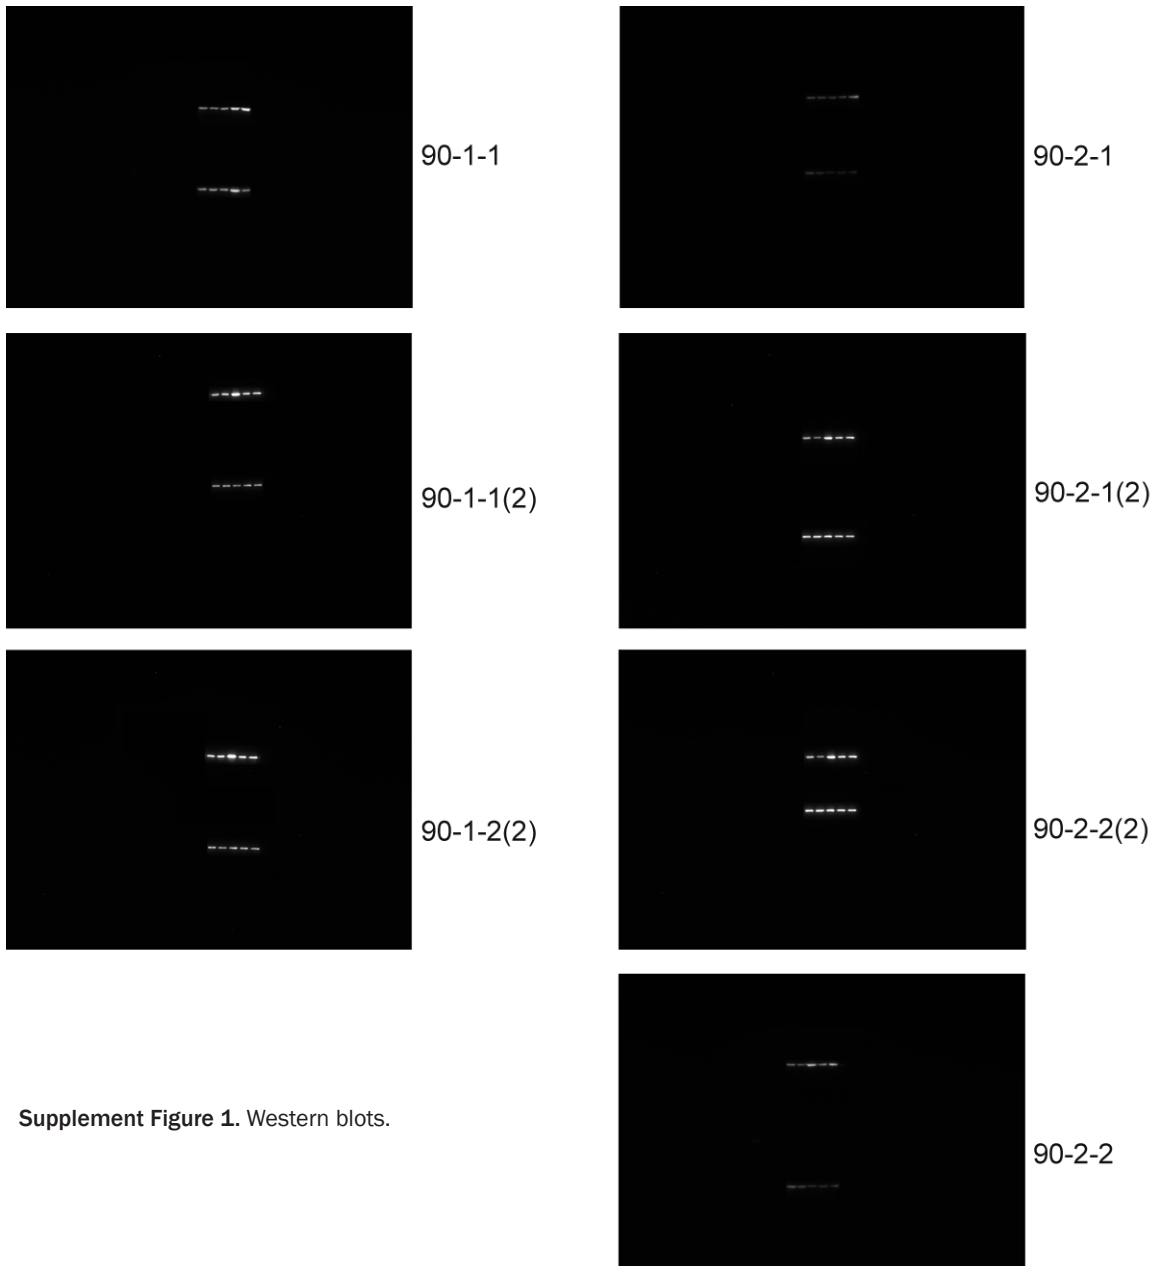

Supplement Figure 1. Western blots.
